# Supplementary material
Source: PubMed Central journal article supplement (PMC7380655)
Supplement: NIHMS1605533-supplement-Supplementary_Material.pdf [file NIHMS1605533-supplement-Supplementary_Material.pdf]

Figure 1A

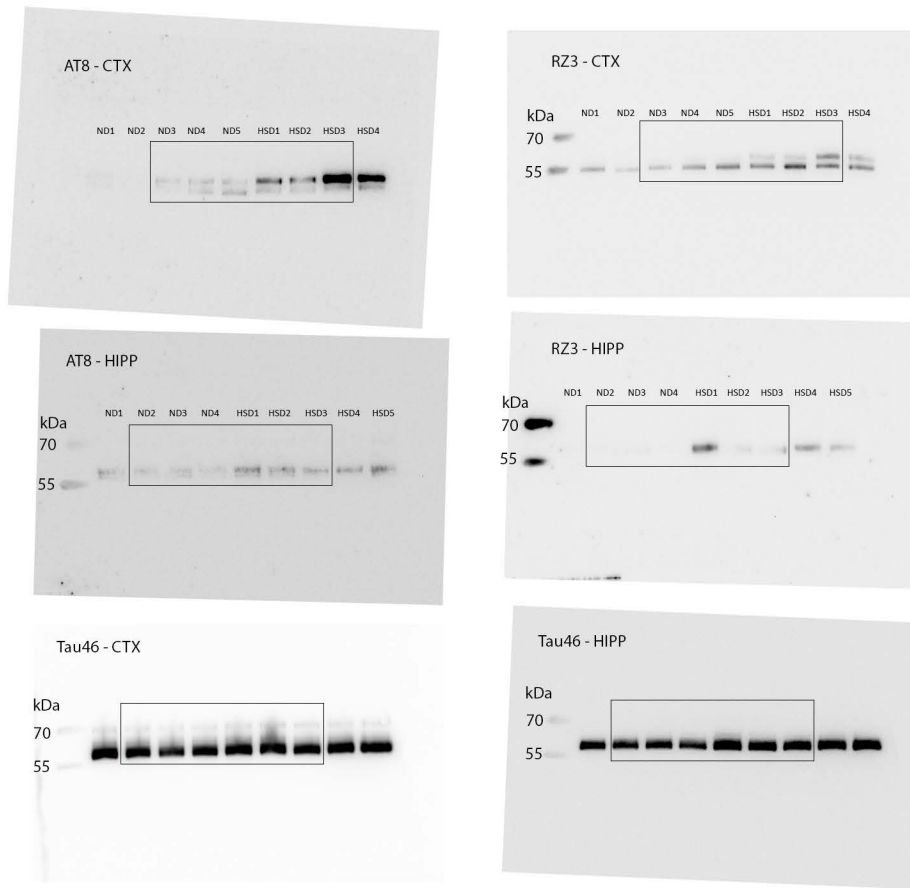

Figure 1C

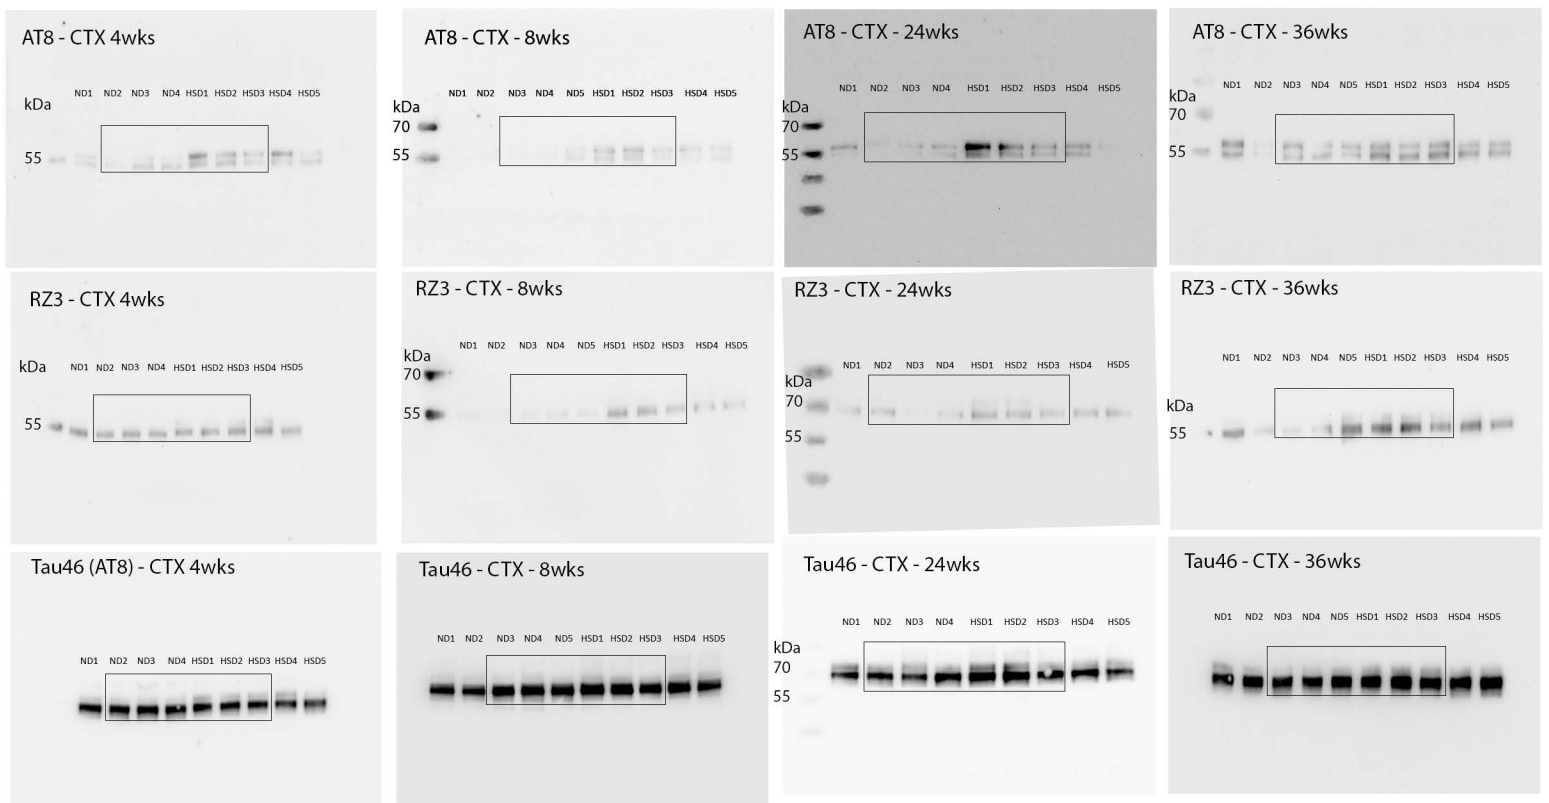

**Gel Source Data - Figure 1.** Full Immunoblots image of Figure 1A and 1C. Membranes were incubated with AT8 or RZ3 antibody (1:500) overnight. After incubation with secondary antibody, protein bands were visualized with Clarity Western ECL Substrate (BioRad) on a Bio Rad ChemiDoc MP Imaging System. After washes with TBS/0.1% Tween-20 (TBST), membranes were incubated with anti-Tau46 antibody (1:1000) overnight. Samples from neocortex and hippocampus ( $\approx 10\mu\text{g}$  of protein/lane).

**Figure 1G**

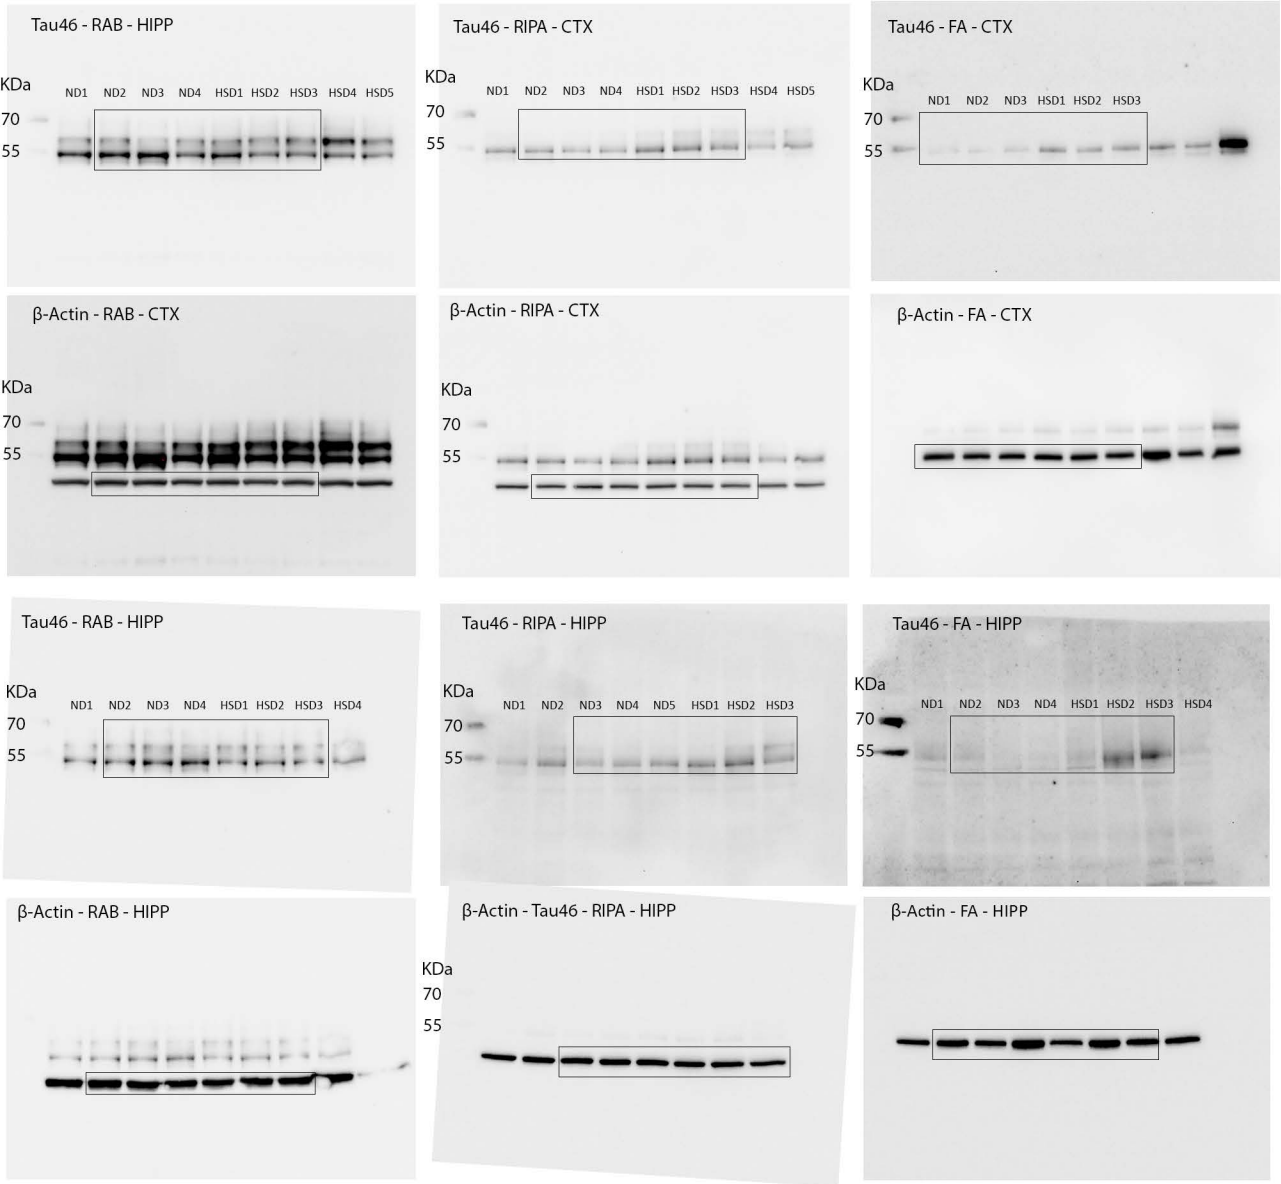

**Figure 1I**

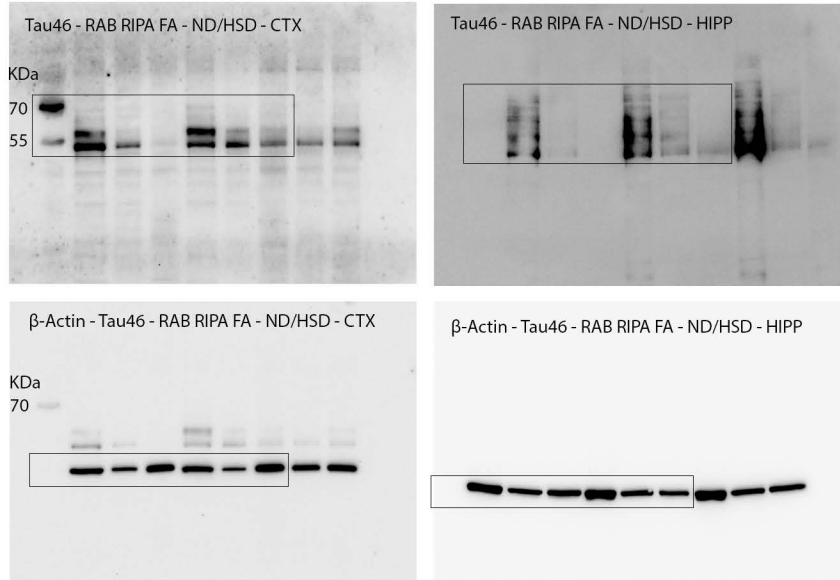

**Gel Source Data - Figure 1.** Full Immunoblots image of Figure 1G-I. Membranes were incubated with Tau46 antibody (1:1000) overnight. After incubation with secondary antibody, protein bands were visualized with Clarity Western ECL Substrate (BioRad) on a Bio Rad ChemiDoc MP Imaging System. After washes with TBS/0.1% Tween-20 (TBST), membranes were incubated with anti- $\beta$ -Actin antibody (1:50000) for 1h. Samples from RAB, RIPA and FA fractions of neocortex and hippocampus ( $\approx 10\mu\text{g}$  of protein/lane).

Figure 2A-B

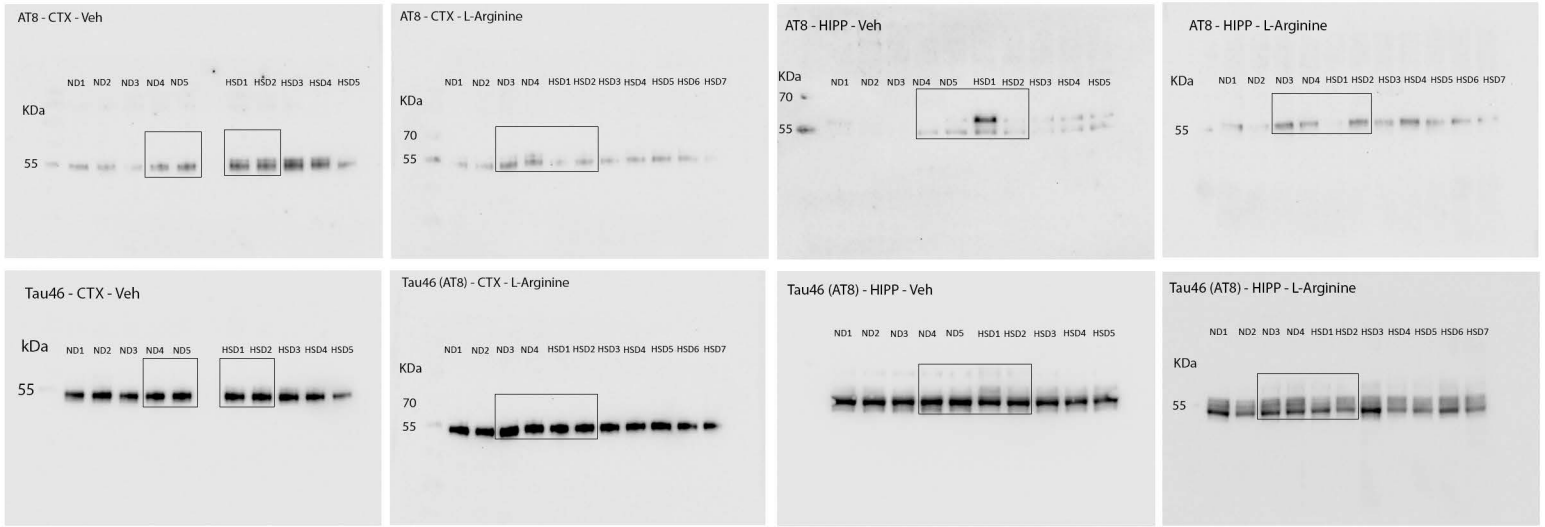

Figure 3A

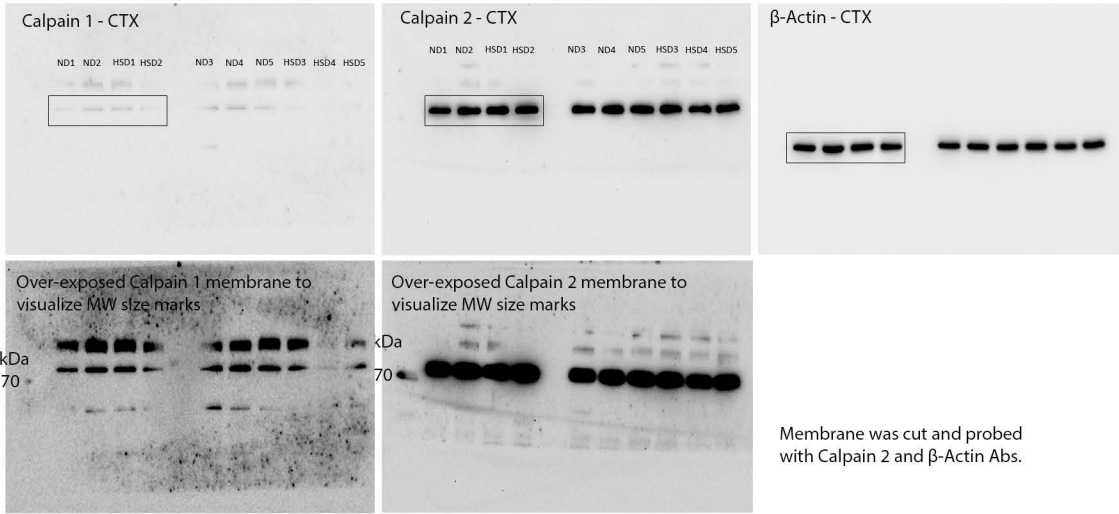

Figure 3B - Western Blotting Gels

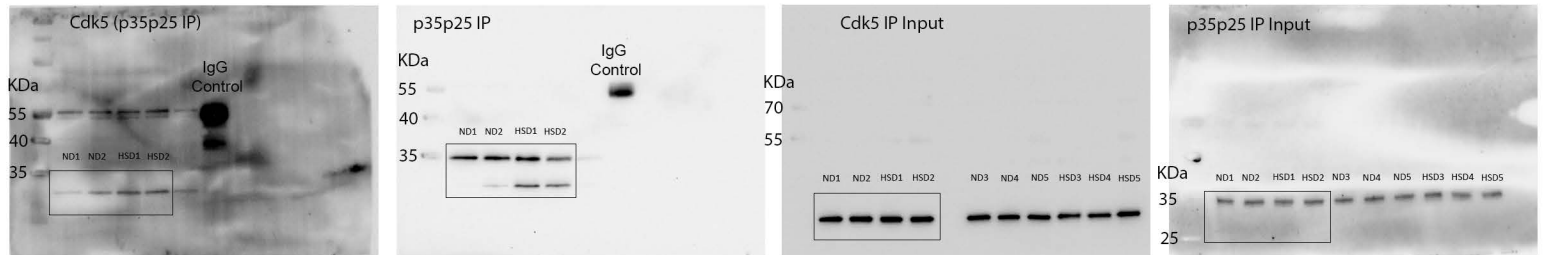

**Gel Source Data - Figure 2,3.** Full Immunoblots image of panels in Figure 2A, B and 3A, B. Membranes were incubated with AT8 antibody (1:500), Calpain 1, Calpain 2, p35p25 and Cdk5 overnight. After incubation with secondary antibody, protein bands were visualized with Clarity Western ECL Substrate (BioRad) on a Bio Rad ChemiDoc MP Imaging System. After washes with TBS/0.1% Tween-20 (TBST), membranes were incubated with anti-Tau46 antibody (1:1000) overnight or  $\beta$ -Actin antibody (1:50000) for 1h at RT. Samples from neocortex and hippocampus ( $\approx 10\mu\text{g}$  of protein/lane).

Figure 3D

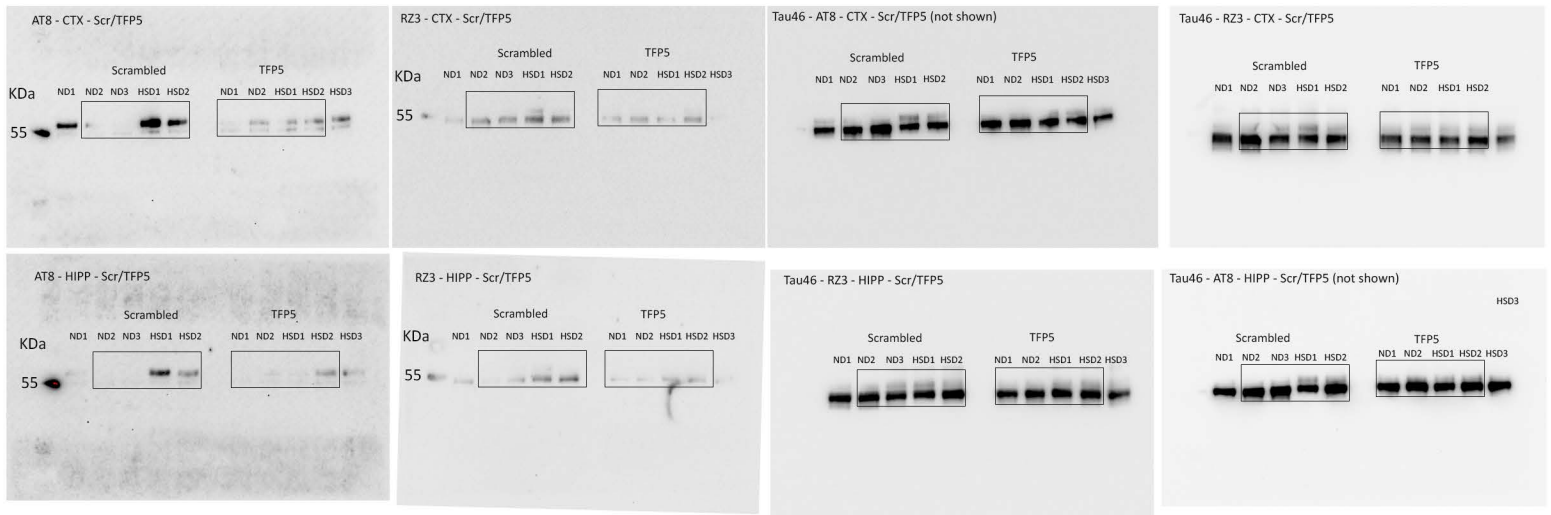

Figure 3G-H

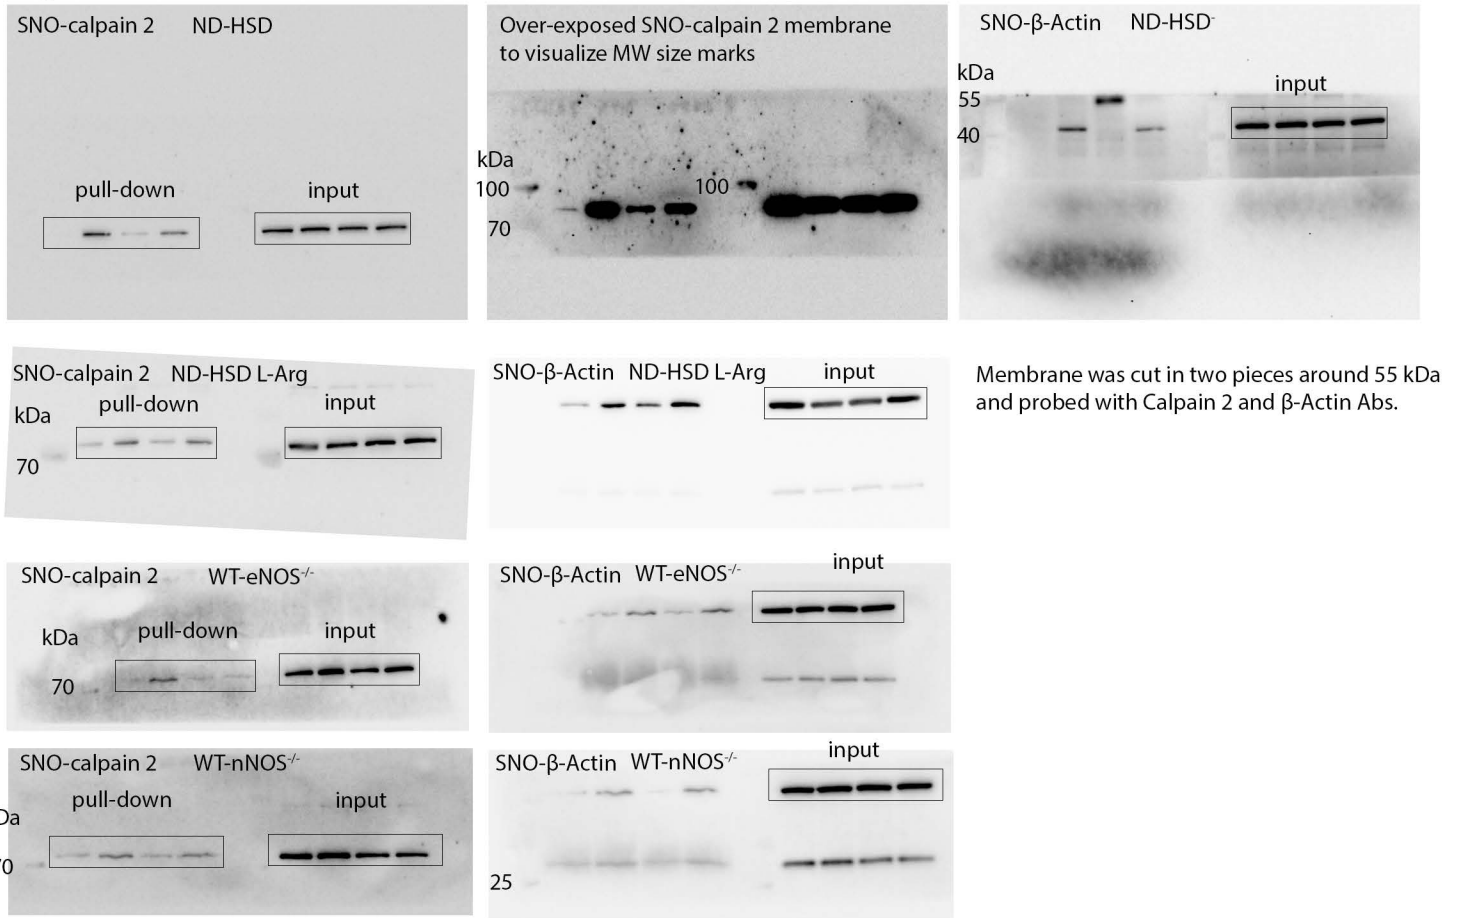

Figure 4A

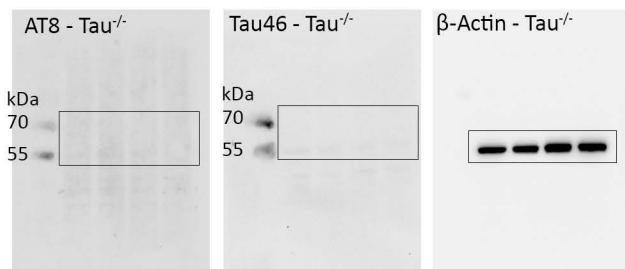

**Gel Source Data - Figure 3.** Full Immunoblots image of Figure 3. Membranes were incubated with AT8, RZ3, Tau46 or Calpain 2 antibody (1:1000) overnight and anti- $\beta$ -Actin antibody (1:50000) for 1h at RT. After incubation with secondary antibodies, protein bands were visualized with Clarity Western ECL Substrate (BioRad) on a Bio Rad ChemiDoc MP Imaging System. Samples from neocortex and hippocampus ( $\approx 10\mu\text{g}$  of protein/lane). Around 1mg of proteins (neocortex) were used for the precipitation of SNO-proteins.

## Extended Figure 1A

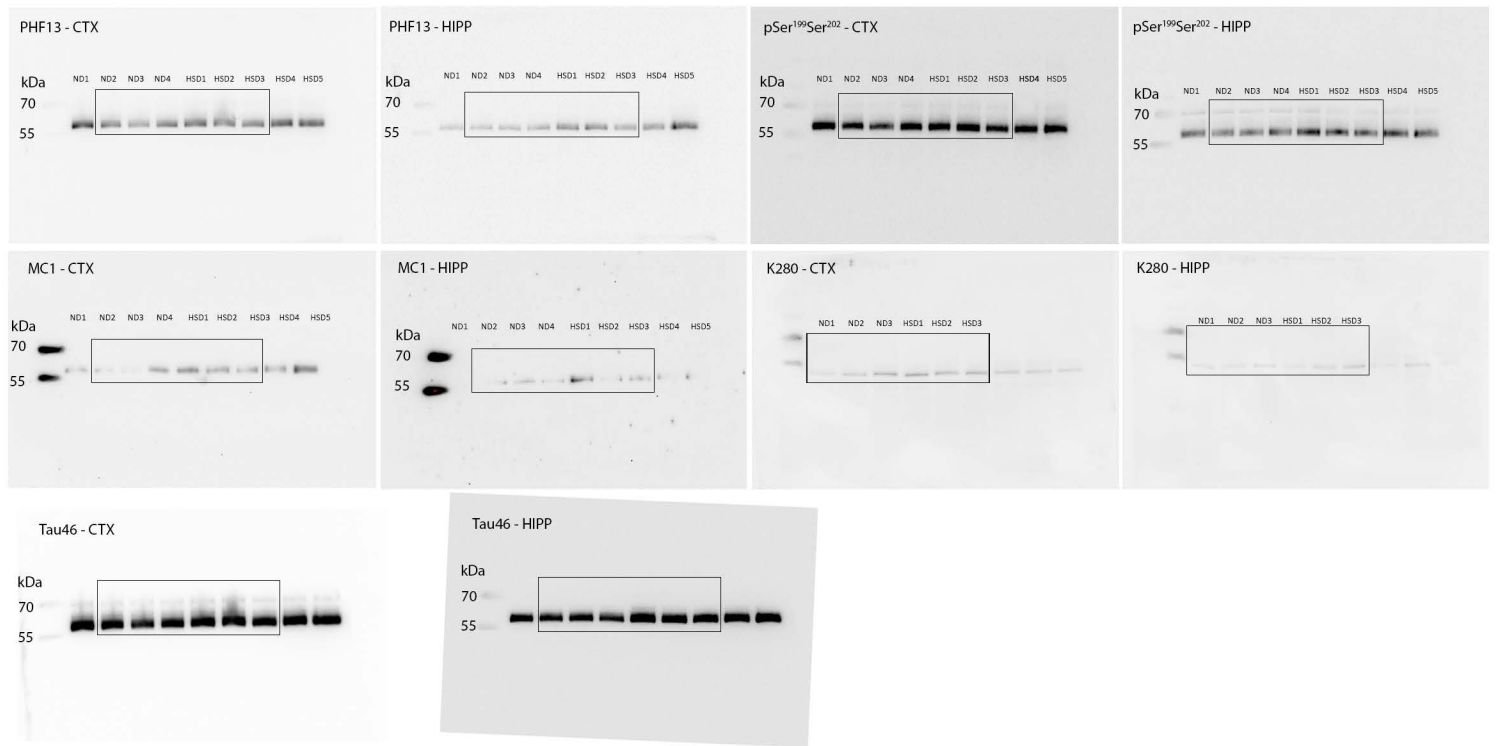

## Extended Figure 1B

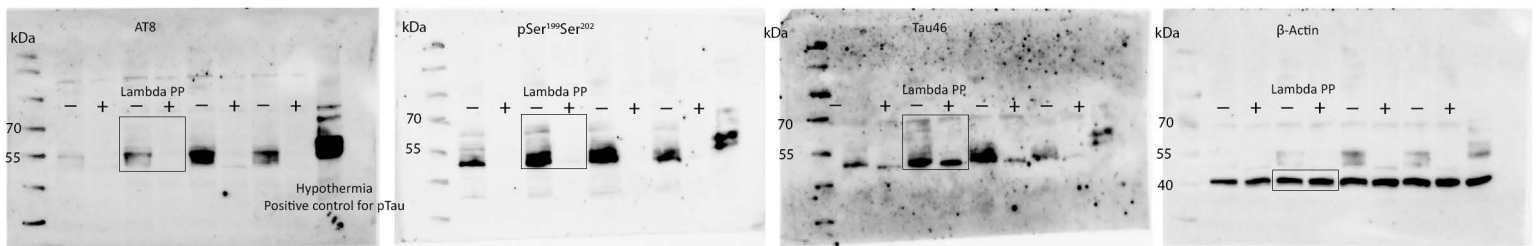

## Extended Figure 1C

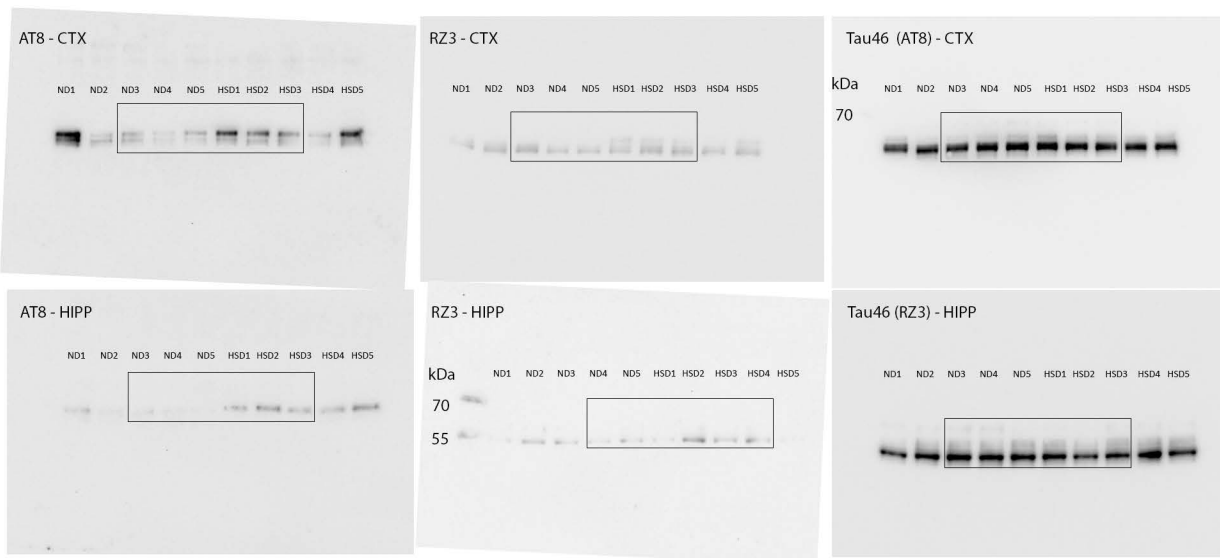

**Gel Source Data - Extended Data Figure 1.** Full Immunoblots image of Extended Figure 1A-C. Membranes were incubated with pTau antibody (1:500 or 1:1000) overnight. After incubation with secondary antibody, protein bands were visualized with Clarity Western ECL Substrate (BioRad) on a Bio Rad ChemiDoc MP Imaging System. After washes with TBS/0.1% Tween-20 (TBST), membranes were incubated with anti-Tau46 antibody (1:1000) overnight. Samples from neocortex and hippocampus ( $\approx 10\mu\text{g}$  of protein/lane).

## Extended Figure 1F

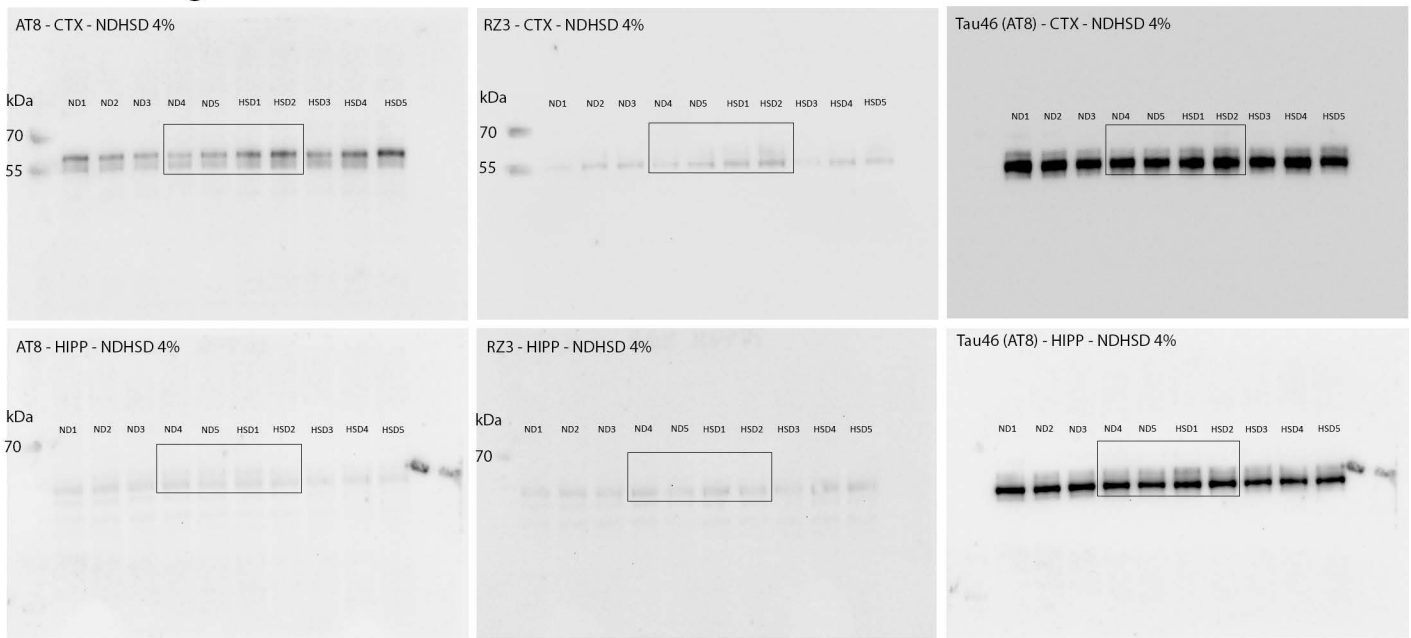

## Extended Figure 1G

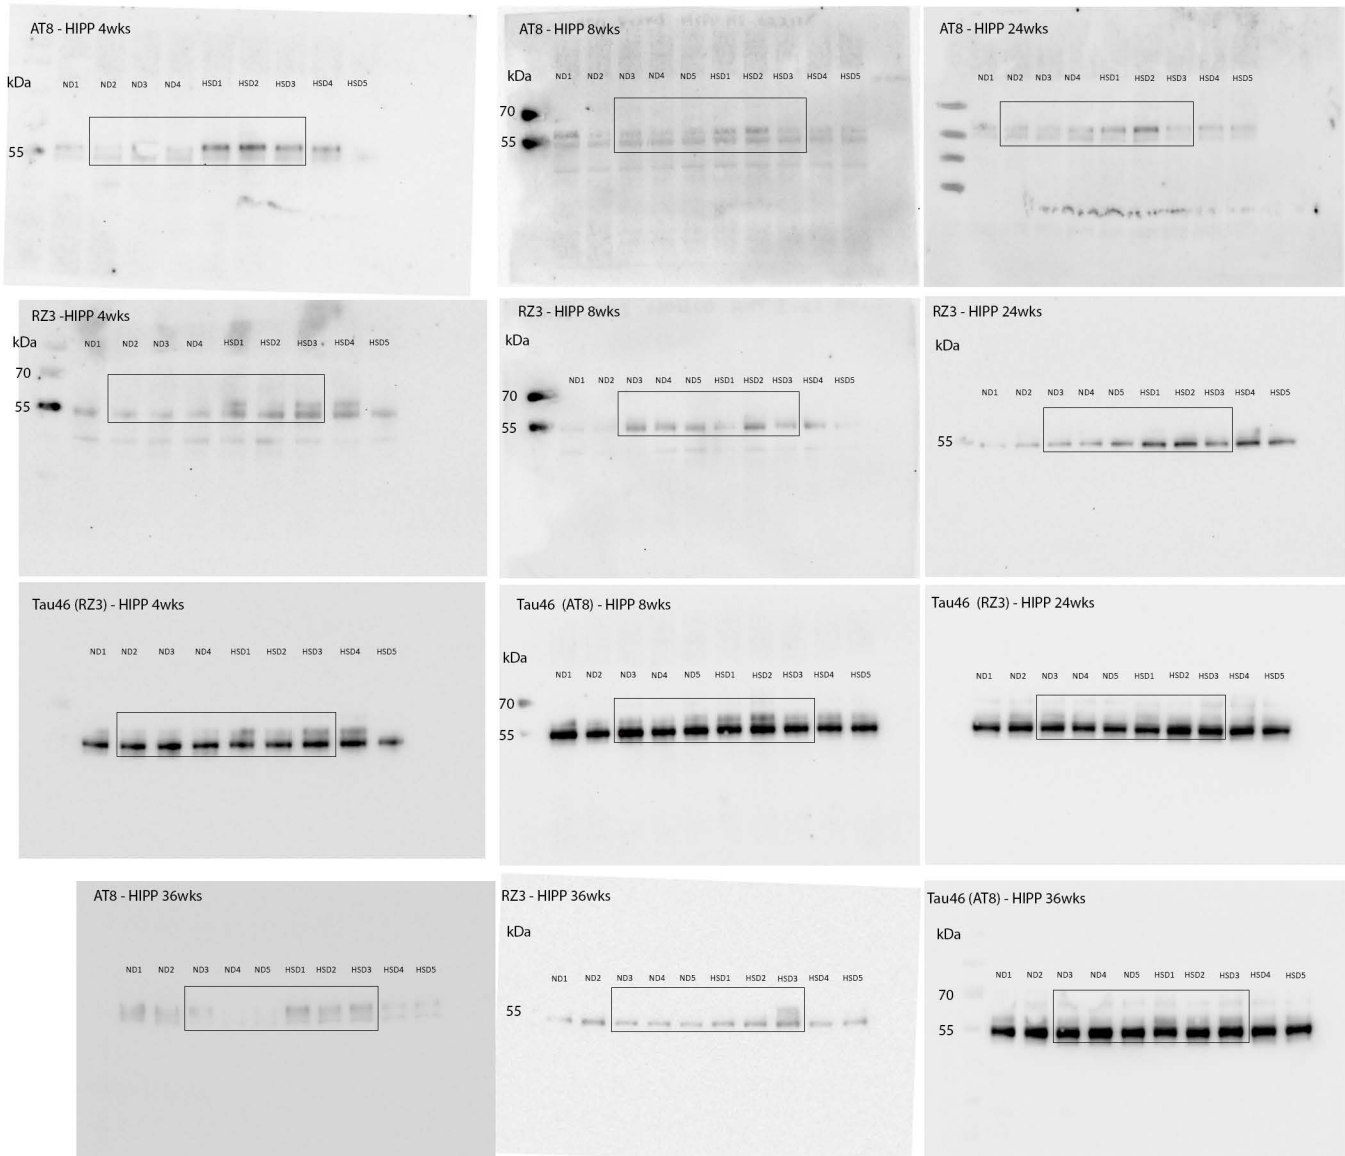

**Gel Source Data - Extended Data Figure 1.** Full Immunoblots image of panels in Extended Figure 1F, G. Membranes were incubated with pTau antibody (1:500 or 1:1000) overnight. After incubation with secondary antibody, protein bands were visualized with Clarity Western ECL Substrate (BioRad) on a Bio Rad ChemiDoc MP Imaging System. After washes with TBS/0.1% Tween-20 (TBST), membranes were incubated with anti-Tau46 antibody (1:1000) overnight. Samples from neocortex and hippocampus ( $\approx 10\mu\text{g}$  of protein/lane).

## Extended Figure 3E

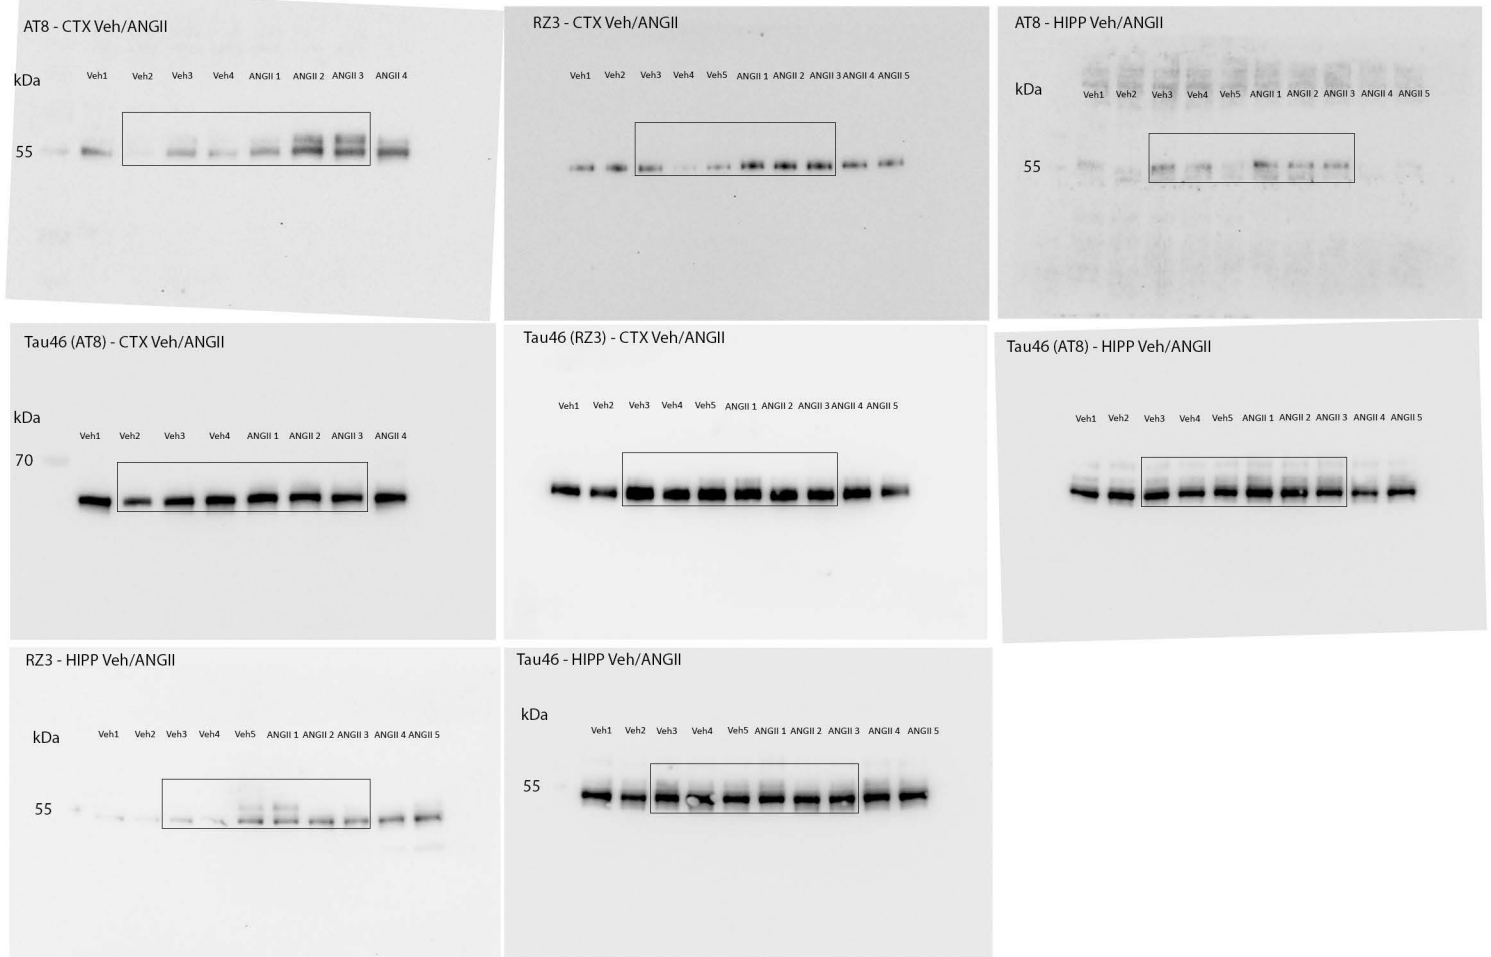

## Extended Figure 3F

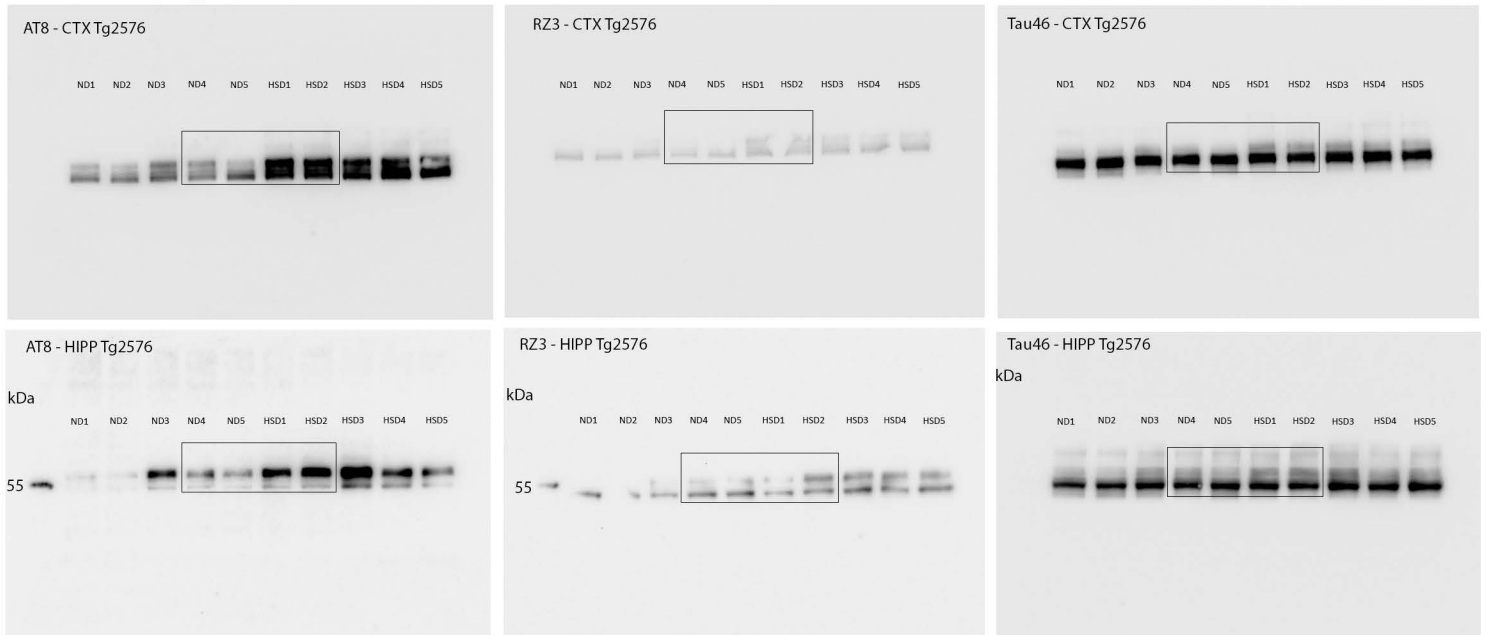

**Gel Source Data - Extended Data Figure 3.** Full Immunoblots image of Extended Figure 3E, F. Membranes were incubated with pTau antibody (1:500 or 1:1000) overnight. After incubation with secondary antibody, protein bands were visualized with Clarity Western ECL Substrate (BioRad) on a Bio Rad ChemiDoc MP Imaging System. After washes with TBS/0.1% Tween-20 (TBST), membranes were incubated with anti-Tau46 antibody (1:1000) overnight. Samples from neocortex and hippocampus ( $\approx 10\mu\text{g}$  of protein/lane).

## Extended Figure 3G

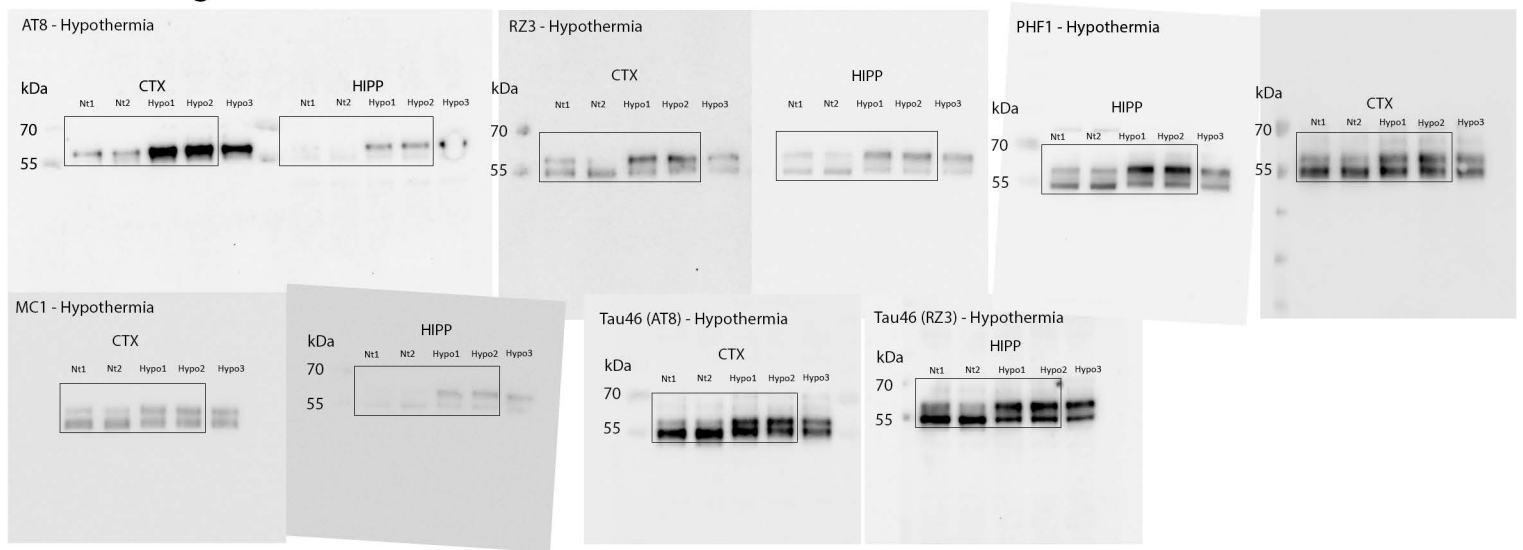

## Extended Figure 4A

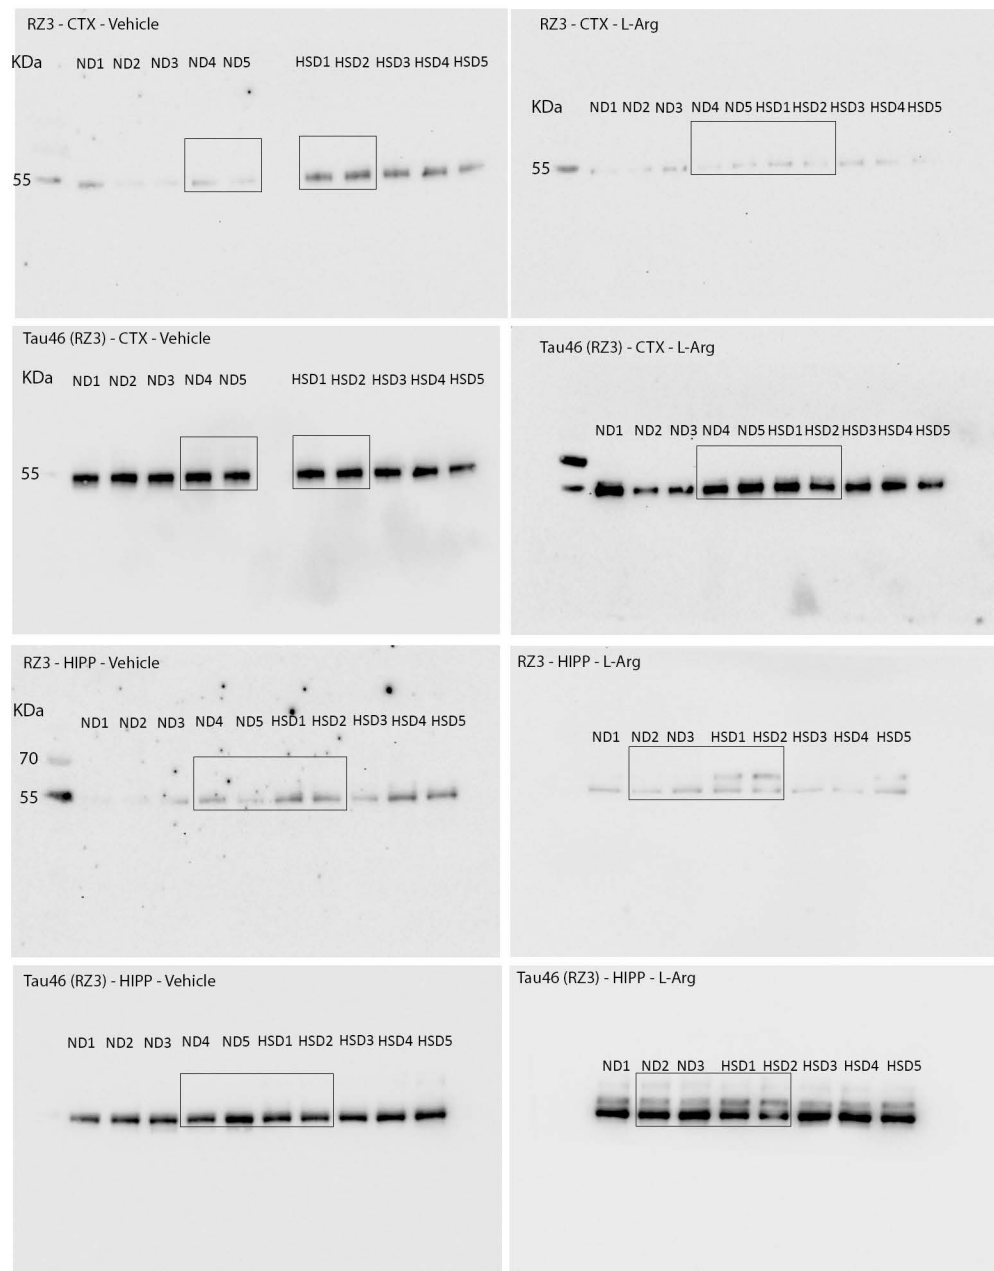

**Gel Source Data - Extended Data Figure 3.** Full Immunoblots image of Extended Figure 3G and 4A. Membranes were incubated with pTau antibody (1:500 or 1:1000) overnight. After incubation with secondary antibody, protein bands were visualized with Clarity Western ECL Substrate (BioRad) on a Bio Rad ChemiDoc MP Imaging System. After washes with TBS/0.1% Tween-20 (TBST), membranes were incubated with anti-Tau46 antibody (1:1000) overnight. Samples from neocortex and hippocampus ( $\approx 10\mu\text{g}$  of protein/lane).



## Extended Figure 4C

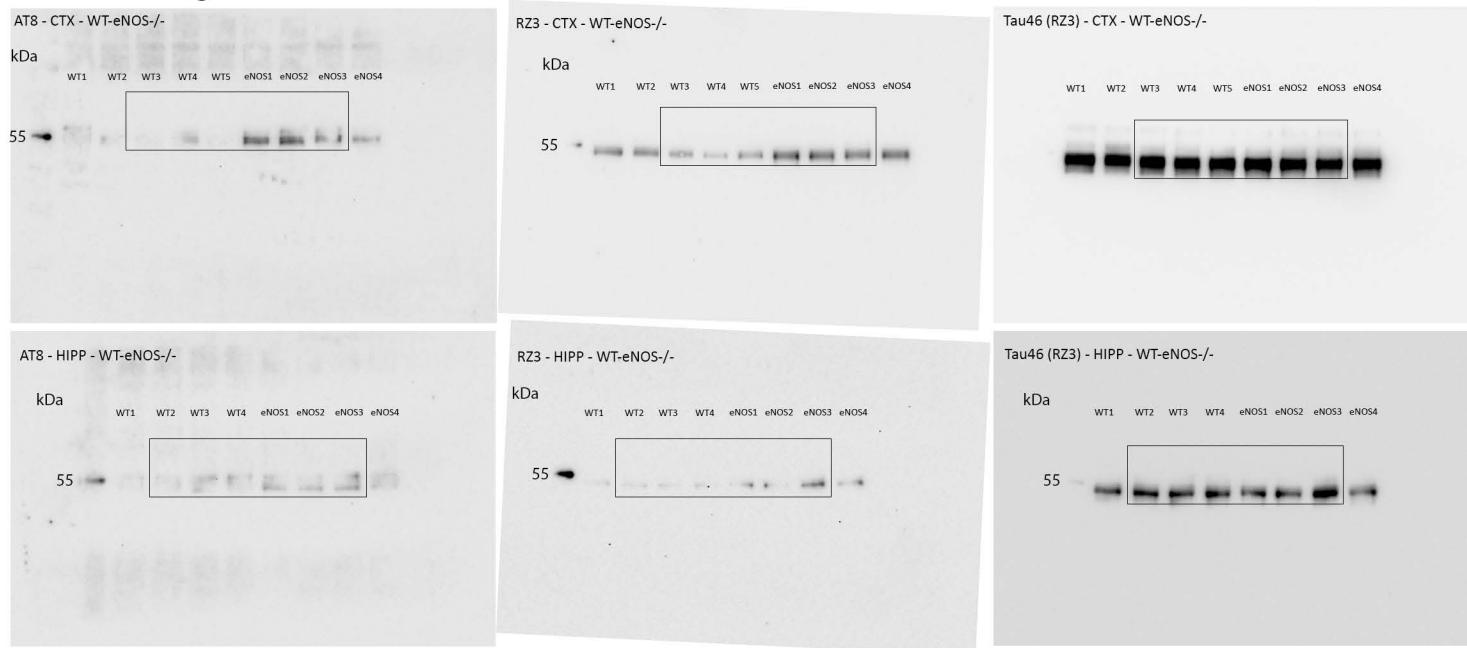

## Extended Figure 4D

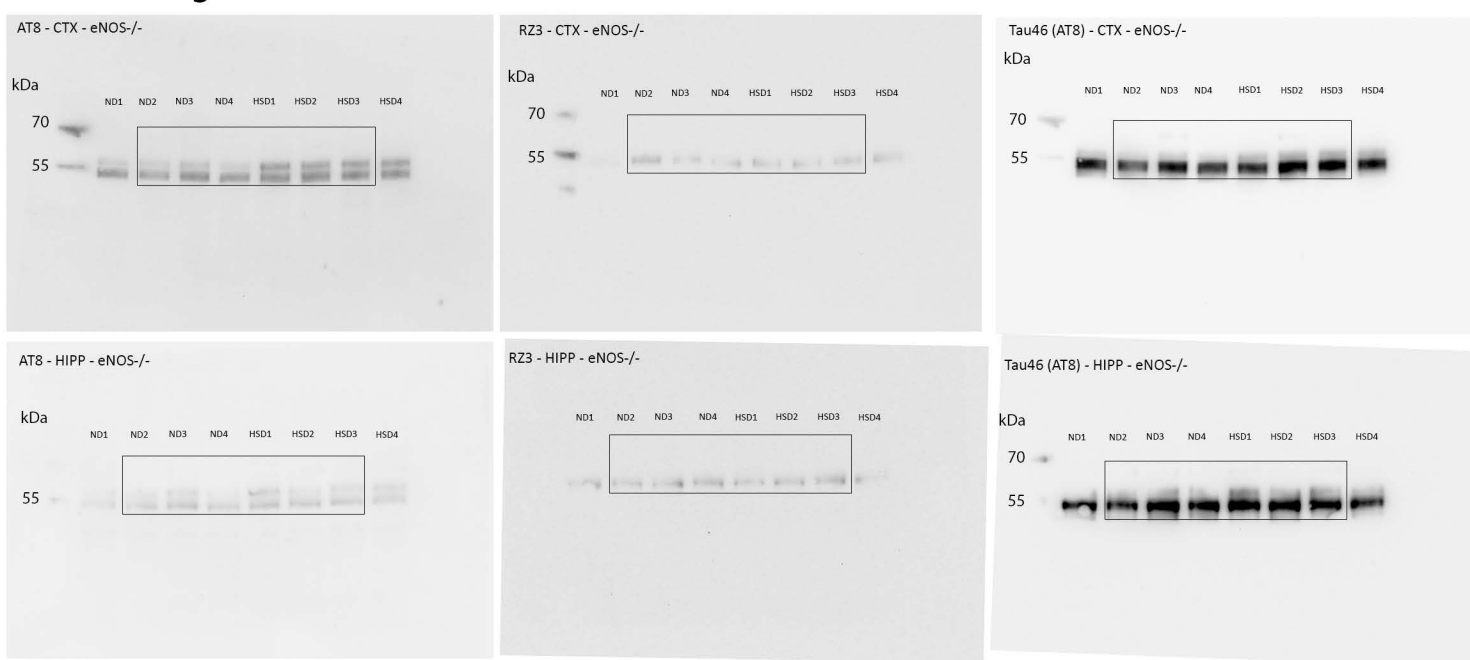

## Extended Figure 4G, H

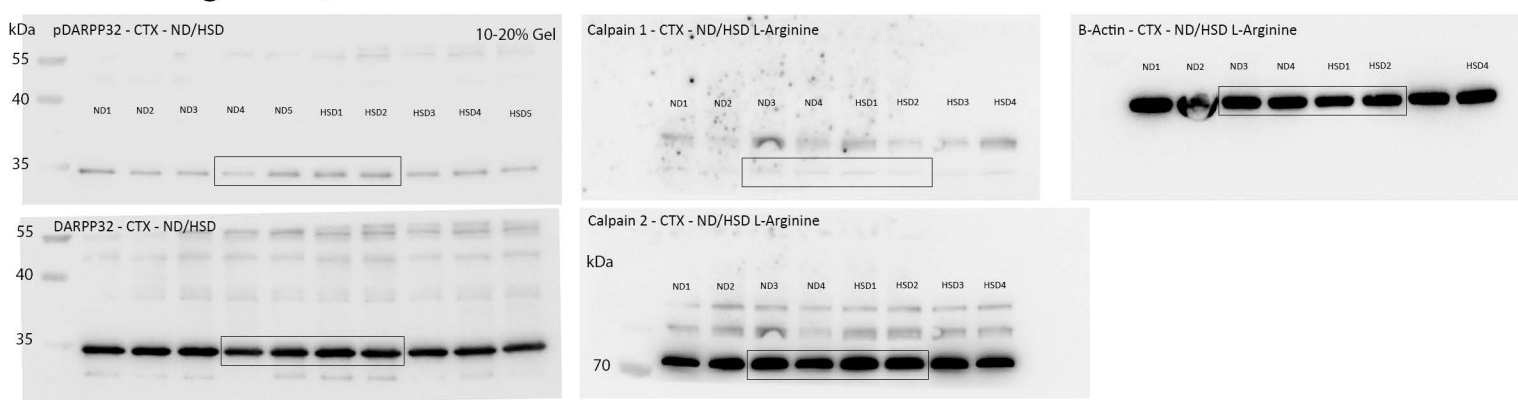

**Gel Source Data - Extended Data Figure 4.** Full Immunoblots image of Extended Figure 4C-H. Membranes were incubated with pTau (1:500 or 1:1000) or pDARPP32/DARPP32 (1:1000) antibodies overnight. After incubation with secondary antibody, protein bands were visualized with Clarity Western ECL Substrate (BioRad) on a Bio Rad ChemiDoc MP Imaging System. After washes with TBS/0.1% Tween-20 (TBST), membranes were incubated with anti-Tau46 antibody (1:1000) overnight. Samples from neocortex and hippocampus ( $\approx 10\mu\text{g}$  of protein/lane).

# Extended Figure 5

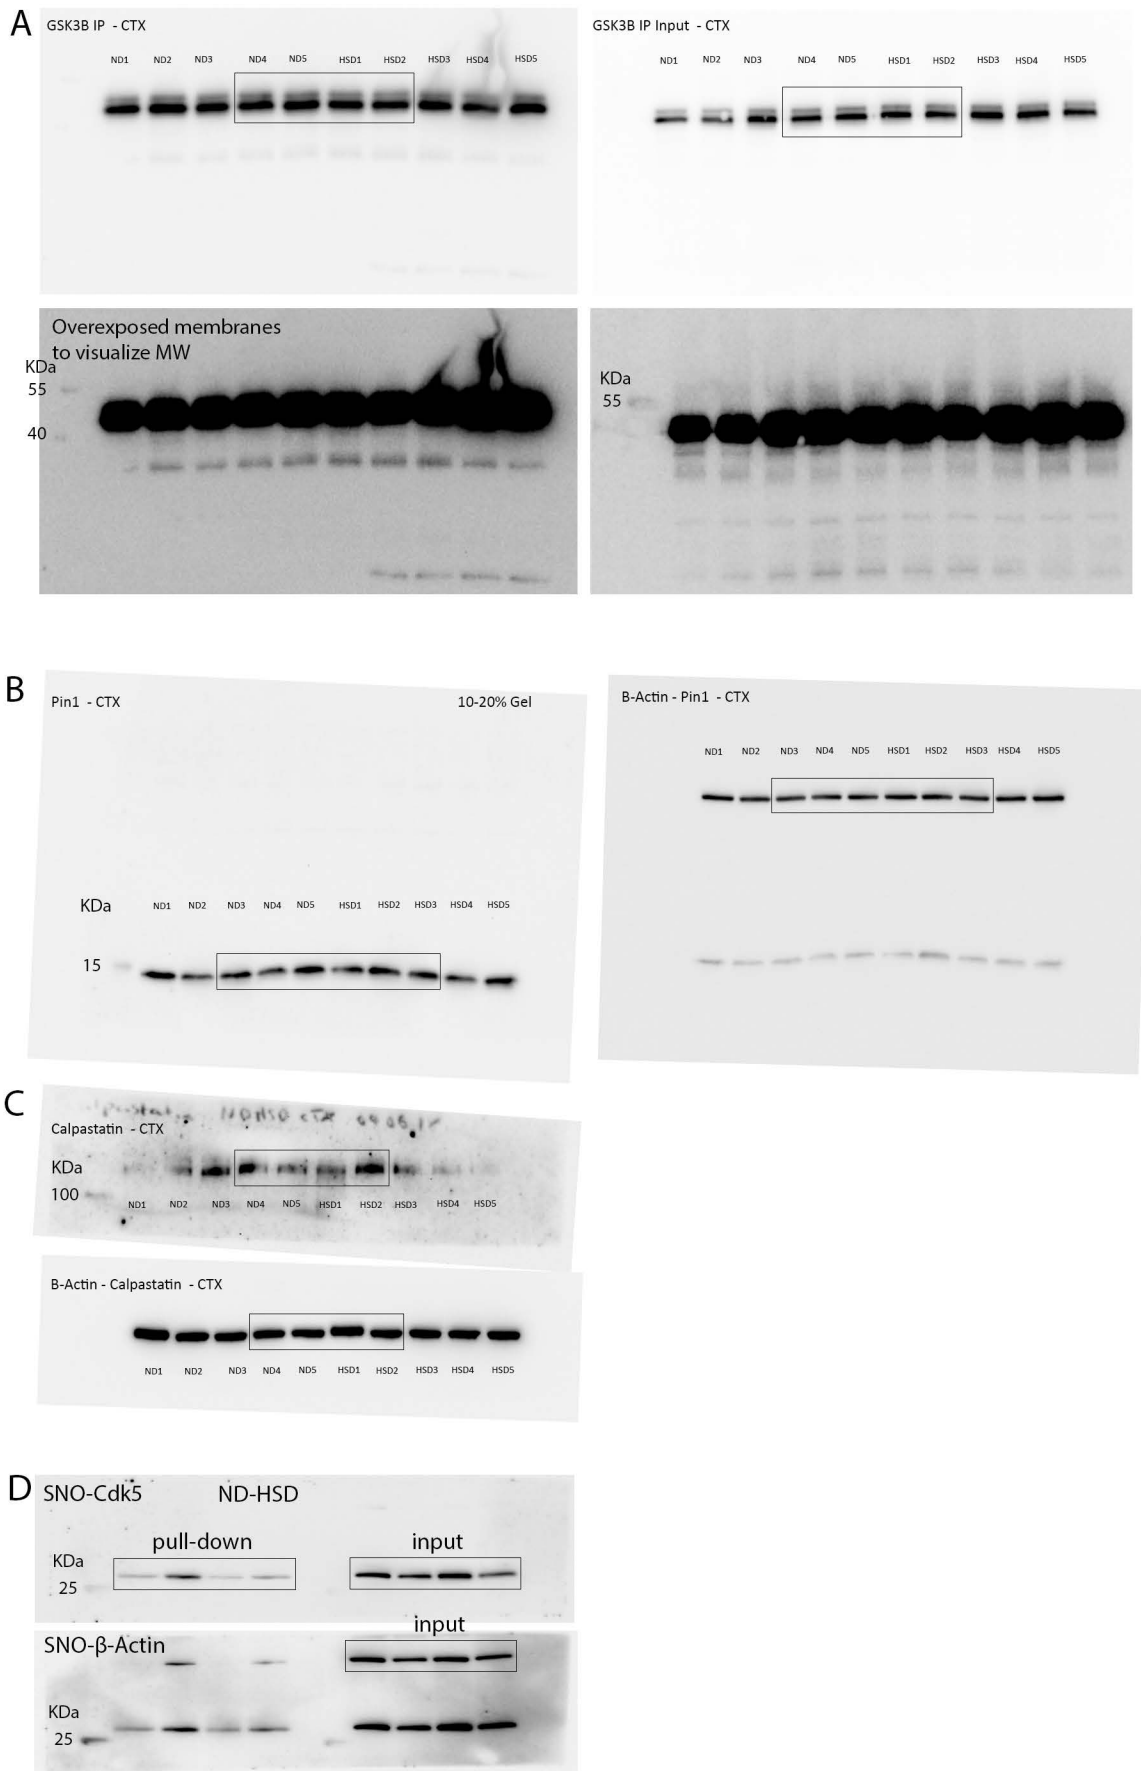

**Gel Source Data - Extended Data Figure 5.** Full Immunoblots image of Extended Figure 5. Membranes were incubated with primary antibodies (1:1000) overnight. After incubation with secondary antibody, protein bands were visualized with Clarity Western ECL Substrate (BioRad) on a Bio Rad ChemiDoc MP Imaging System. After washes with TBS/0.1% Tween-20 (TBST), membranes were incubated with anti- $\beta$ -Actin antibody (1:50000) for 1h at RT. Samples from neocortex ( $\approx$ 10-15 $\mu$ g of protein/lane).

Figure 4E

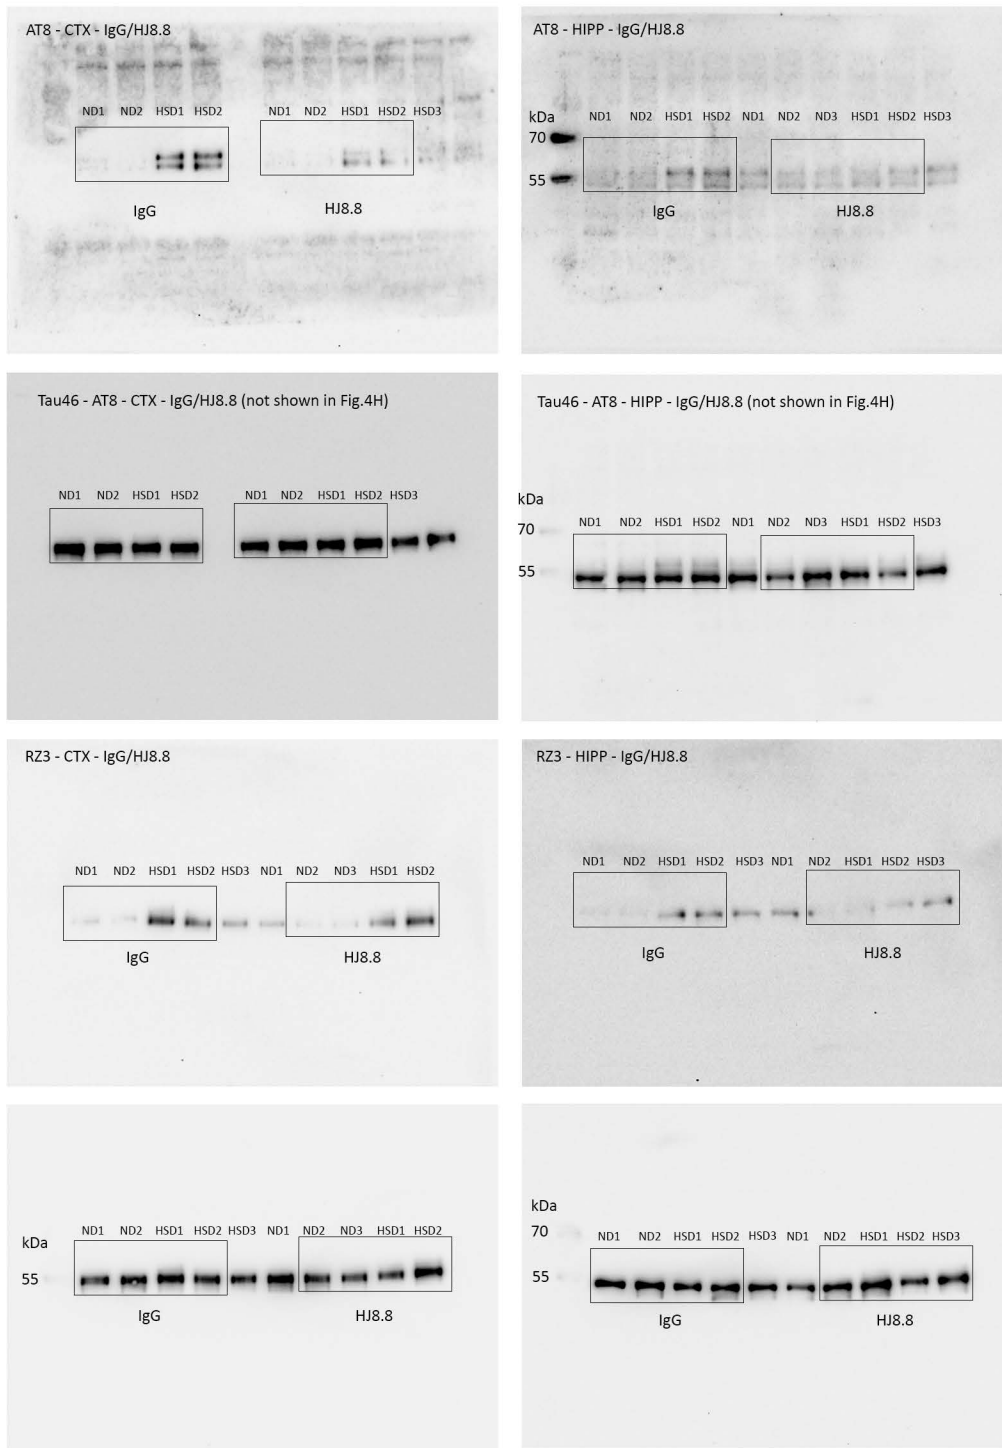

Figure 4H

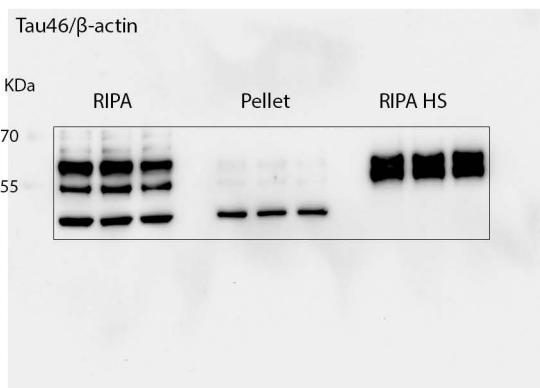

**Gel Source Data - Extended Data Figure 5.** Full Immunoblots image of Figure 4. Membranes were incubated with AT8 or RZ3 antibody (1:500) overnight. After incubation with secondary antibody, protein bands were visualized with Clarity Western ECL Substrate (BioRad) on a Bio Rad ChemiDoc MP Imaging System. After washes with TBS/0.1% Tween-20 (TBST), membranes were incubated with anti-Tau46 antibody (1:1000) overnight. Samples from neocortex and hippocampus ( $\approx 10\mu\text{g}$  of protein/lane).
